# Supplementary material for: DET1 and HY5 Control PIF4-Mediated Thermosensory Elongation Growth through Distinct Mechanisms
Source: PubMed Central journal article supplement (PMC5263232; doi:10.1016/j.celrep.2016.12.046), 2017-01-10
Supplement: mmc1.pdf [file mmc1.pdf]

**Cell Reports, Volume 18**

**Supplemental Information**

**DET1 and HY5 Control PIF4-Mediated Thermosensory  
Elongation Growth through Distinct Mechanisms**

**Sreeramaiah N. Gangappa and S. Vinod Kumar**

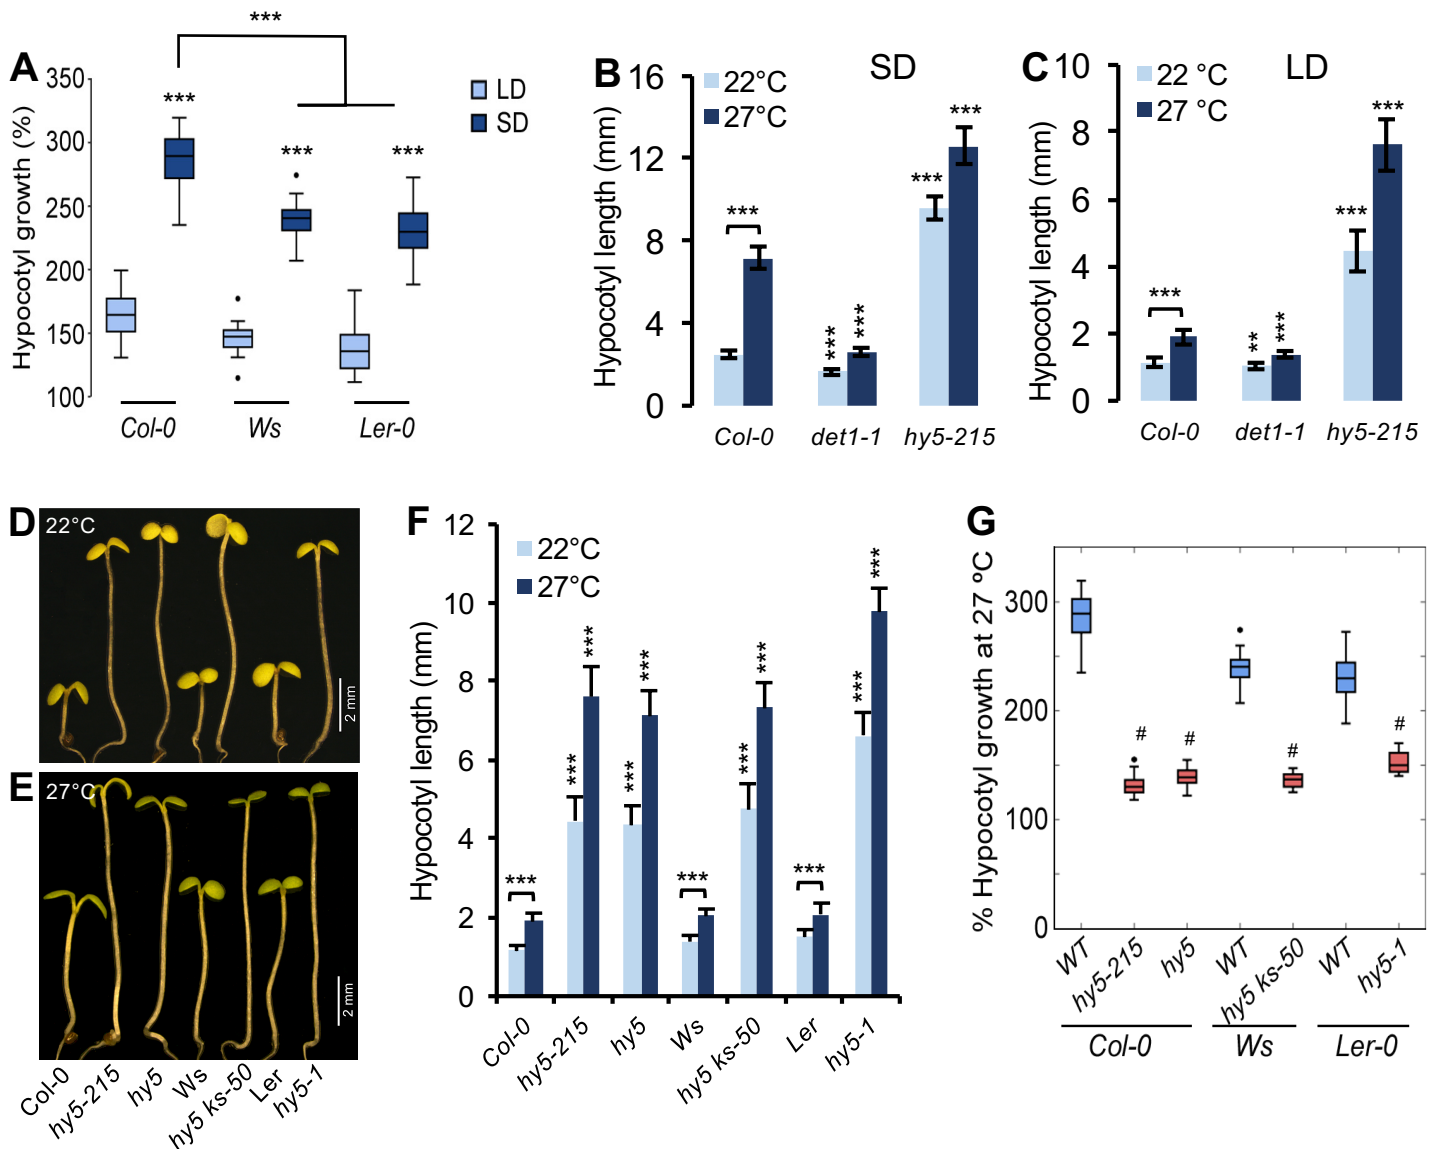

**Figure S1. Thermosensory hypocotyl growth is photoperiod dependent. Related to Figure 1.**

(A) Percent hypocotyl growth response (27 °C to 22 °C) of *Col-0*, *Ws*, and *Ler-0* ecotypes grown under long-days (LD) and short-days (SD) for seven-days. Data shown is mean±SD ( $n \geq 20$ ). \*\*\* $P \leq 0.001$  (Student's *t*-test) significantly different from LD in corresponding ecotypes or between indicated pairs as shown. (B and C) Hypocotyl length measurement data (mean±SD;  $n \geq 20$ ) of *Col-0*, *det1-1*, and *hy5-215* mutants grown in 22 °C and 27 °C SD (B) and LD (C) for seven-days. (D-G) Representative seedling pictures of various *hy5* mutant alleles and their corresponding Wild-Types grown at constant 22 °C (D) and 27 °C (E) under short-days for seven-days. (F and G) Hypocotyl elongation measurement data (F) (mean±SD;  $n \geq 20$ ) and % hypocotyl growth (27 °C to 22 °C) (G) of genotypes shown in (D) and (E). # $P \leq 0.0001$  (Student's *t*-test) significantly different from corresponding wild-type strains. In Figure S1B, S1C, and S1F, \*\* $P \leq 0.01$ , \*\*\* $P \leq 0.001$  (Student's *t*-test) significantly different from *Col-0* in corresponding temperature conditions or between indicated pairs.

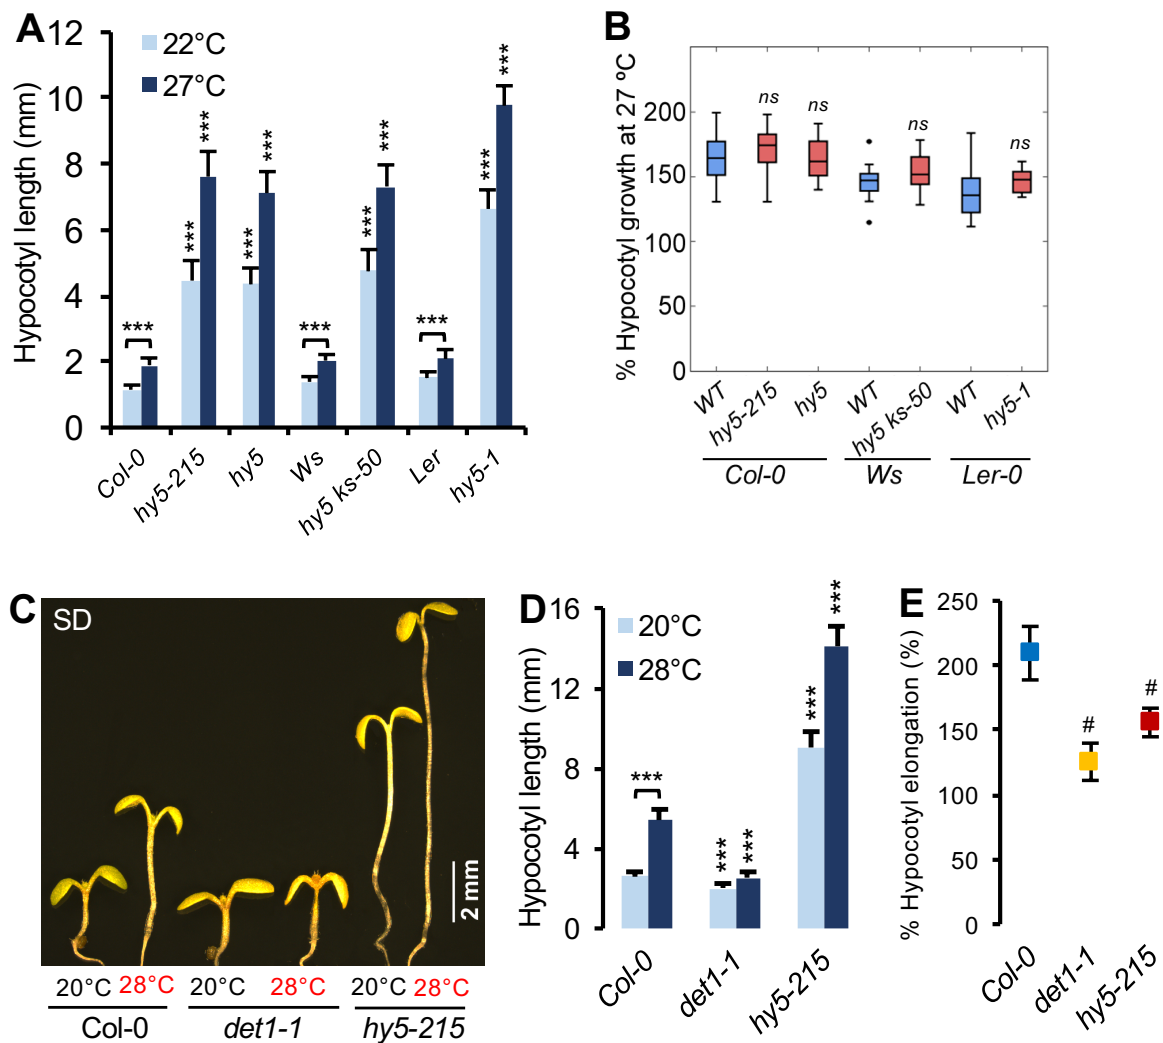

**Figure S2. Control of thermosensory hypocotyl growth by DET1 and HY5. Related to Figure 1.**

(A and B) Hypocotyl measurement data (A) (mean±SD;  $n \geq 20$ ) and percent hypocotyl growth (B) of various *hy5* alleles grown at constant 22 and 27 °C under LD for seven-days. \*\*\* $P \leq 0.001$  (Student's *t*-test) significantly different from corresponding wild-types in corresponding temperature conditions or between indicated pairs. *ns*, not-significantly different from the respective wild-types. (C-D) Representative seedling hypocotyl picture (C), hypocotyl elongation measurement data (D) (mean±SD;  $n \geq 20$ ). \*\*\* $P \leq 0.001$  (Student's *t*-test) significantly different from Col-0 in corresponding temperature conditions or between indicated pairs. (E) Relative hypocotyl response (%) of the genotypes shown in (C). # $P \leq 0.001$  (Student's *t*-test) significantly different from corresponding wild-type strains.

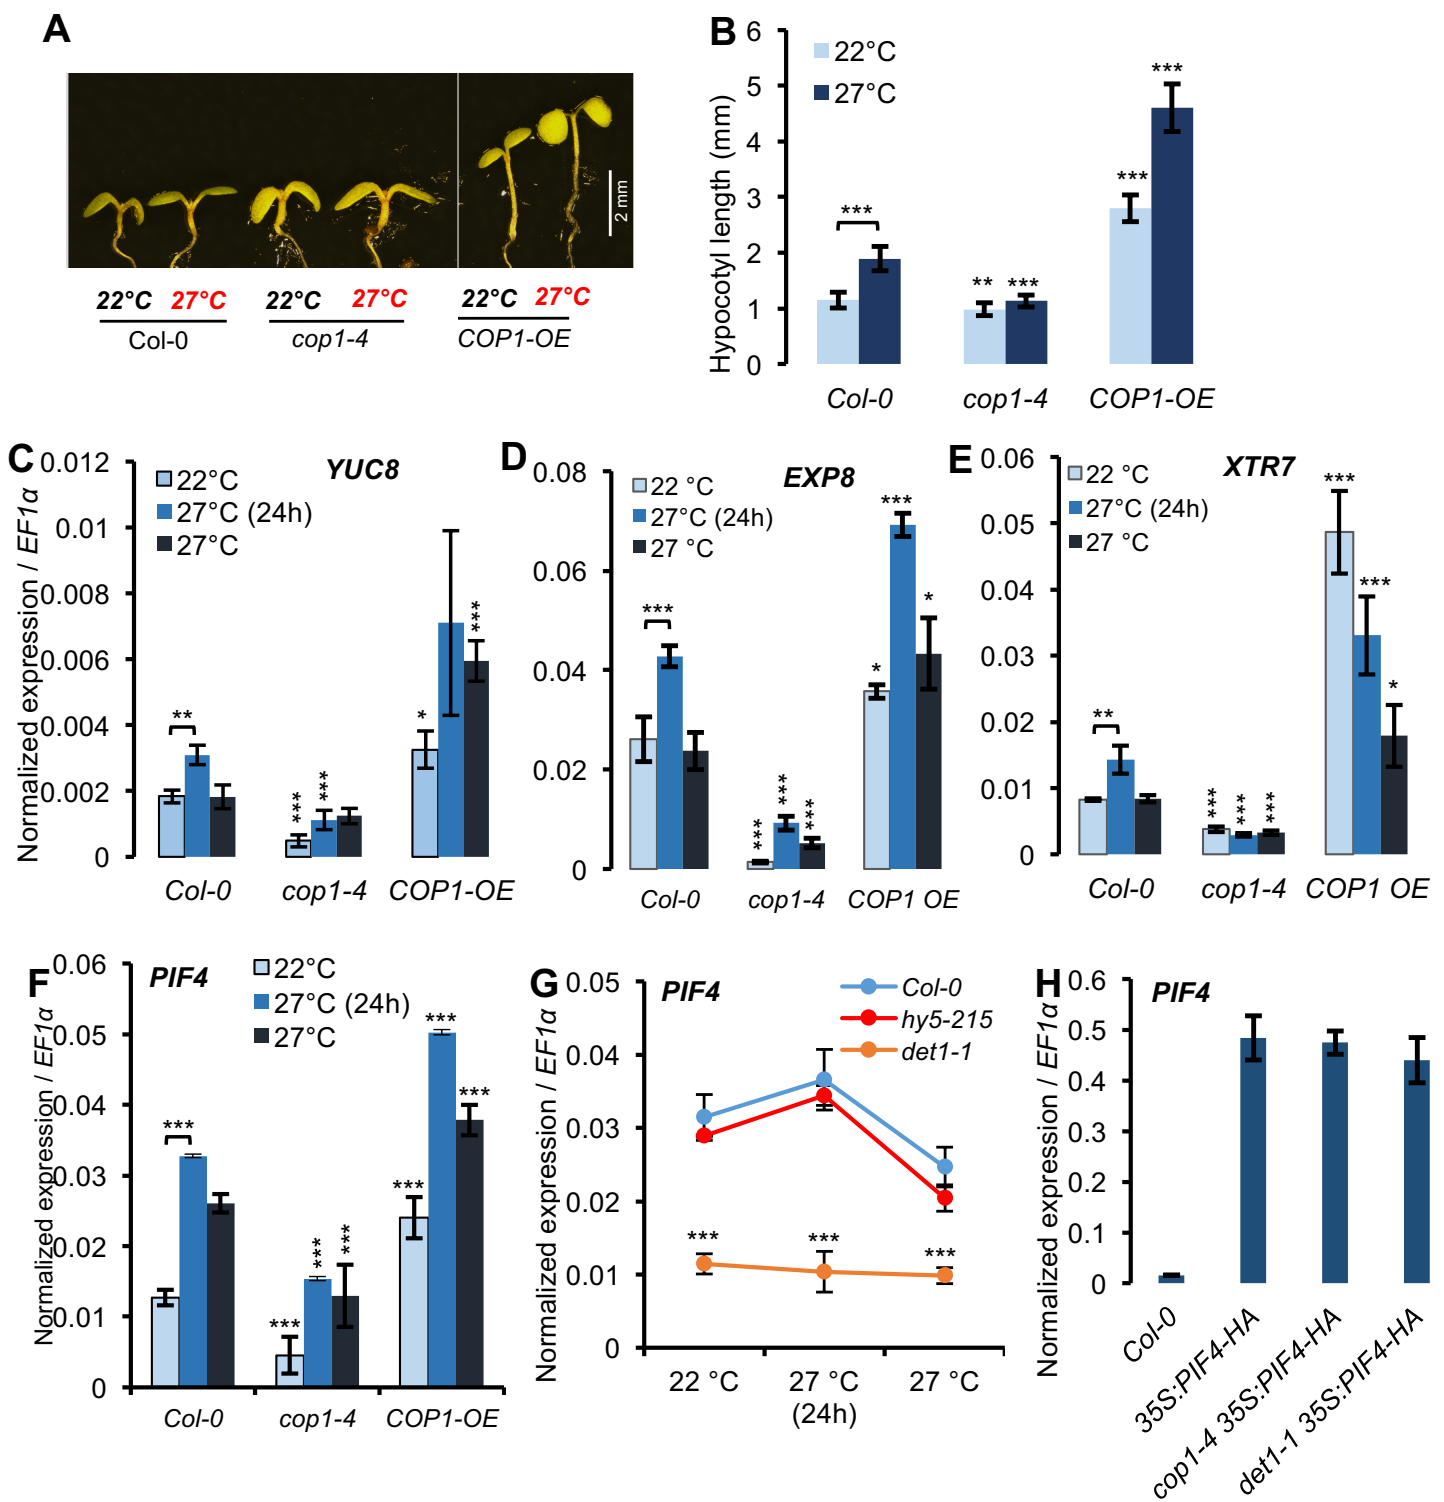

**Figure S3. Thermosensory hypocotyl growth and the expression of elongation-related genes. Related to Figure 1 and Figure 3.**

(A and B) Representative seedling hypocotyl picture (A) and measurement data (B) (mean±SD;  $n \geq 20$ ) of Col-0, *cop1-4*, and *COP1-OE* lines in 22 °C and 27 °C for seven-days in LD. (C-F) Expression of growth responsive genes *YUC8* (C), *EXP8* (D), and *XTR7* (E); and *PIF4* (F) are downregulated in *cop1-4* mutant, but upregulated in *COP1-OE* compared to Col-0 as measured by qRT-PCR (mean±SD of three biological replicates) in seven-day-old seedlings grown constantly at 22 °C, after 24 h incubation at 27 °C, as well as continuous growth at 27 °C in short day conditions. (G) Expression of *PIF4* in Col-0, *hy5-215*, and *det1-1* as measured by qRT-PCR (mean±SD of three biological replicates) in seven-day-old seedlings grown at constant 22 °C and 27 °C, and 27 °C adapted seedlings for 24h in LD conditions. (H) Expression of *PIF4* in 35S:*PIF4*-HA, *cop1-4* 35S:*PIF4*-HA, and *det1-1* 35S:*PIF4*-HA as measured by qRT-PCR (mean±SD of three biological replicates) in seven-day-old seedlings grown at constant 22 °C SD conditions. In Figure S3B-S3G, \* $P \leq 0.05$ , \*\* $P \leq 0.01$ , \*\*\* $P \leq 0.001$  (Student's *t*-test) significantly different from Col-0 in corresponding temperature conditions or between indicated pairs.

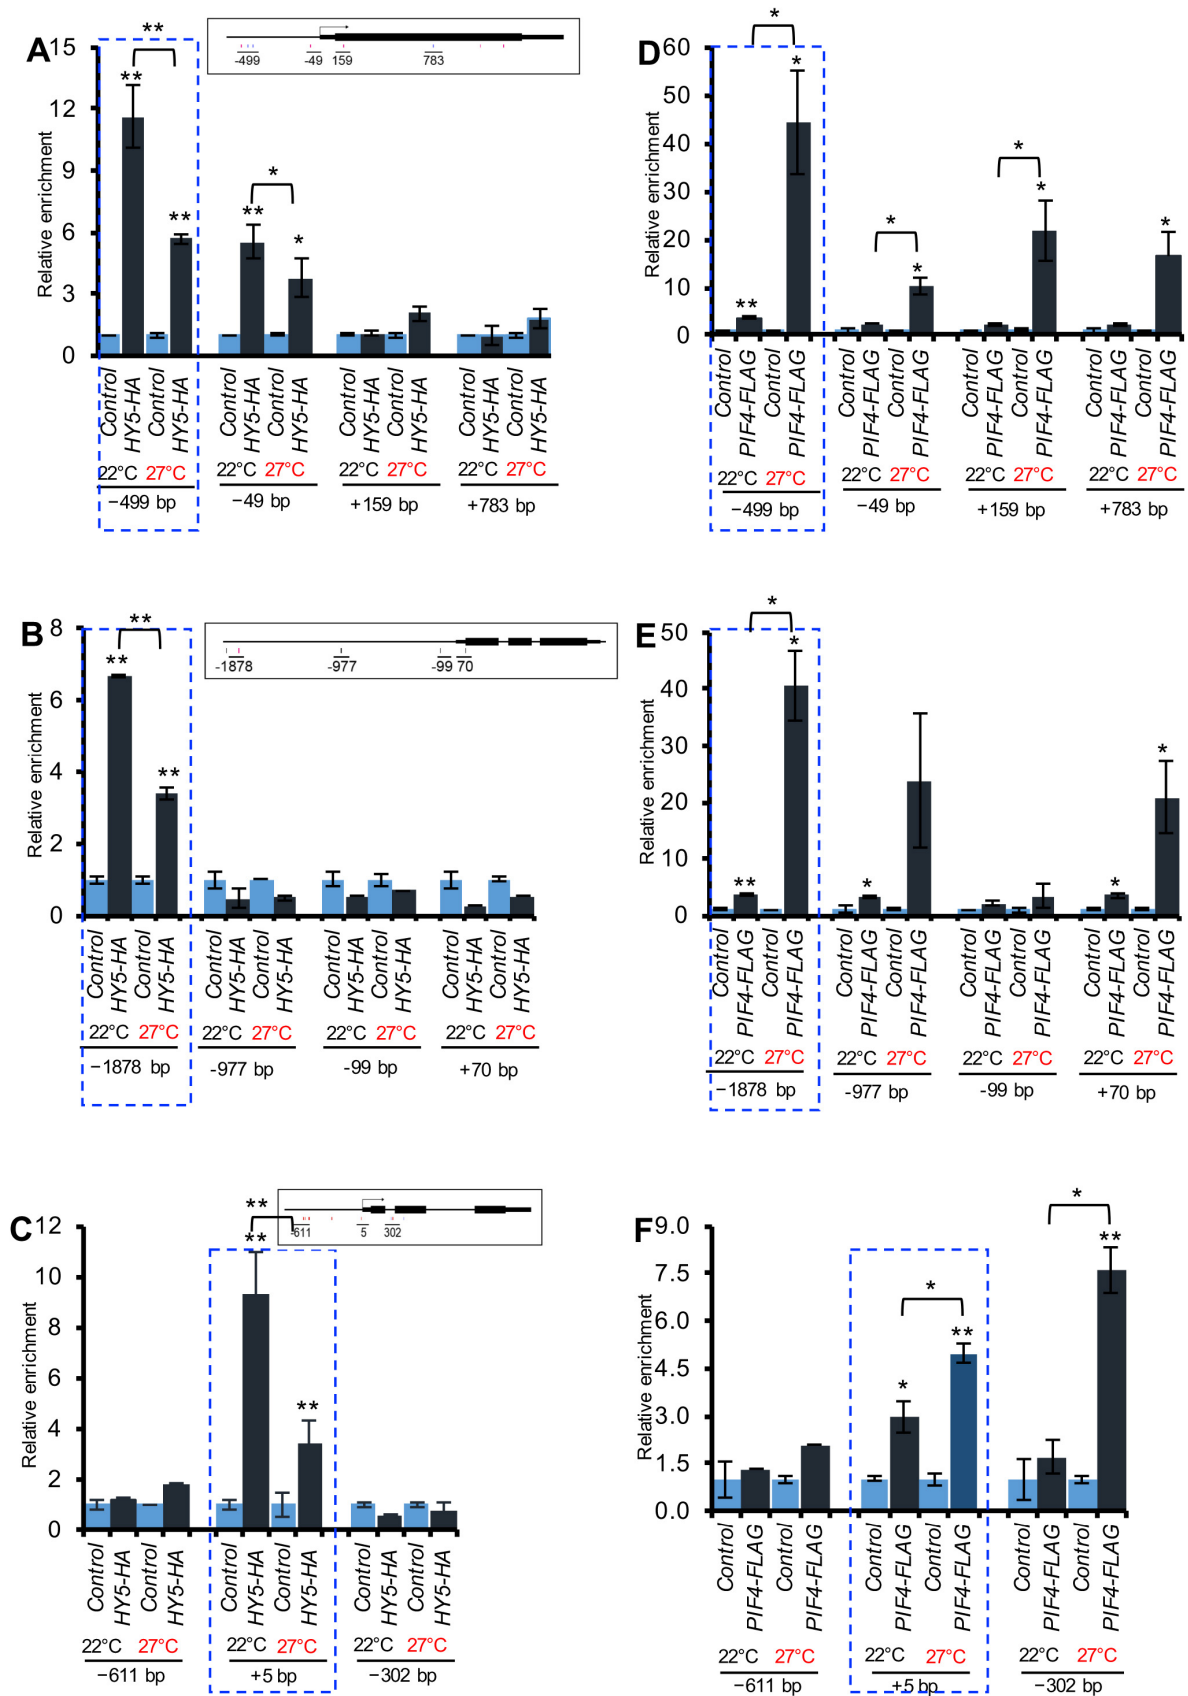

**Figure S4. HY5 binds to the PIF4 targets. Related to Figure 4.**

(A-F) ChIP analysis showing binding of HY5 (A-C) and PIF4 (D-F) to the PIF4 targets such as *YUC8* (A and D), *XTR7* (B and E), *EXP8* (C and F) as measured by qRT-PCR (mean±SD of two biological replicates) in seven-day-old seedlings grown at constant 22 °C, and 27 °C adapted seedlings for 24 h in short day conditions. Insets in A, B and C show gene diagram along with position of G-box (blue line) and/or E-box (red line) elements present in the promoters, and position of primer pairs used for Q-PCR. \* $P \leq 0.05$ , \*\* $P \leq 0.01$ , \*\*\* $P \leq 0.001$  (Student's *t*-test) significantly different from wild-type (Control) in corresponding temperature conditions or between indicated pairs. Marked area with the blue dotted line indicate the regions that are shown in the Figure 4A-4C and 4E-4G, respectively for *HY5-HA* and *PIF4-FLAG*.

**Table S1. Oligo nucleotide sequences used in the study. Related to Figure1, Figure3 and Figure4**

| Name                                             | Oligo No. | Oligo Sequence (5'.....3') | Purpose |
|--------------------------------------------------|-----------|----------------------------|---------|
| <b>Primers used for gene expression analysis</b> |           |                            |         |
| <i>EXP8-F</i>                                    | 633       | CTCTTCCGAAGAGTACCATGT      | Q-PCR   |
| <i>EXP8-R</i>                                    | 634       | GTGTACGTCTCCTGCTCCTC       | Q-PCR   |
| <i>YUC8-F</i>                                    | 615       | CGATGAGACCAGTGGCTTGT       | Q-PCR   |
| <i>YUC8-R</i>                                    | 616       | TTTTCTCCCGTAGCCACCAC       | Q-PCR   |
| <i>PIF4-F</i>                                    | 766       | ACCTCAGAGACGGTTAAGCC       | Q-PCR   |
| <i>PIF4-R</i>                                    | 767       | TGGAGGAGGCATGACTTGAG       | Q-PCR   |
| <i>ATHB2-F</i>                                   | 667       | CCGTCGGCTACAAAAAGAAG       | Q-PCR   |
| <i>ATHB2-R</i>                                   | 668       | GAAGGGCACATGGTCAAAGT       | Q-PCR   |
| <i>XTR7-F</i>                                    | 1127      | CGGCTTGCACAGCCTCTT         | Q-PCR   |
| <i>XTR7-R</i>                                    | 1128      | TCGGTTGCCACTTGCAATT        | Q-PCR   |
| <b>Primers used for ChIP analysis</b>            |           |                            |         |
| <i>YUC8-F</i> (-499 bp)                          | 1294      | GGAATGGGTTTGATGTGGA        | Q-PCR   |
| <i>YUC8-R</i> (-499 bp)                          | 1295      | GGTGATTCTTTGTGGGACC        | Q-PCR   |
| <i>YUC8-F</i> (-49 bp)                           | 1296      | TCGTGAGTGGAAAAATATTCA      | Q-PCR   |
| <i>YUC8-R</i> (-49 bp)                           | 1297      | TGGAATGGTTTTGAATTTGG       | Q-PCR   |
| <i>YUC8-F</i> (+159 bp)                          | 1298      | GGAGAATATGTTTCGTTTGATGG    | Q-PCR   |
| <i>YUC8-R</i> (+159 bp)                          | 1299      | CTAACCCCGACGGTCCAG         | Q-PCR   |
| <i>YUC8-F</i> (+783 bp)                          | 1300      | AGTTTCTCTTGACCTAGCAAACC    | Q-PCR   |
| <i>YUC8-R</i> (+783 bp)                          | 1301      | AACATCTTCATTGCAAGCTCAA     | Q-PCR   |
| <i>EXP8-F</i> (-611 bp)                          | 1286      | AAACCTTCAACAAAAATGTGAGG    | Q-PCR   |
| <i>EXP8-R</i> (-611 bp)                          | 1287      | ACATGCAAATGTTGCGGTTA       | Q-PCR   |
| <i>EXP8-F</i> (-611 bp)                          | 1288      | GGACAATTATTCCTCGAGTAC      | Q-PCR   |
| <i>EXP8-R</i> (-611 bp)                          | 1289      | AGGAGGGGTTAGTTATTTCCGGT    | Q-PCR   |
| <i>EXP8-F</i> (-611 bp)                          | 1290      | GGGTACGTATGACCAATCCCA      | Q-PCR   |
| <i>EXP8-R</i> (-611 bp)                          | 1291      | GTGTTTCGTCCTGTAACCTTG      | Q-PCR   |
| <i>XTR7-R</i> (-1878 bp)                         | 1336      | GGATTTTCATTGTATTTGCATGCC   | Q-PCR   |
| <i>XTR7-R</i> (-1878 bp)                         | 1337      | TAGTGCTACATCCGACGTGT       | Q-PCR   |
| <i>XTR7-R</i> (-977 bp)                          | 1338      | TGGTTTCAATAGACGATCCTTGT    | Q-PCR   |
| <i>XTR7-R</i> (-977 bp)                          | 1339      | CGTCGACCACACCATTCTCT       | Q-PCR   |
| <i>XTR7-R</i> (-99 bp)                           | 1340      | GGAATTTTAGAGATTTTCTCATCTG  | Q-PCR   |
| <i>XTR7-R</i> (-99 bp)                           | 1341      | GCATTGGGAAGCTAAGACCA       | Q-PCR   |
| <i>XTR7-R</i> (+70 bp)                           | 1342      | ACACCAAACACAAAGCTCTCA      | Q-PCR   |
| <i>XTR7-R</i> (+70bp)                            | 1343      | CAAGAAGAACAGTCGCCACG       | Q-PCR   |
